# Supplementary material for: Design and synthesis of copper(ii) malonates with N,N′-containing linkers
Source: Royal Society of Chemistry journal article supplement (doi:10.1039/d3ce00081h), 2023-01-01
Supplement: d3ce00081h1.pdf [file d3ce00081h1.pdf]

Electronic Supporting Information for

**Design and synthesis of copper(II) malonates with N,N'-containing linkers**

Ekaterina N. Zorina-Tikhonova,<sup>a</sup> Aleksandr S. Chistyakov,<sup>a</sup> Veronika A. Novikova,<sup>a,b</sup> Daniil A. Knyazev,<sup>a</sup> Natalia V. Gogoleva,<sup>a</sup> Daniil O. Blinou,<sup>a</sup> Nikolay N. Efimov,<sup>a</sup> Pavel V. Dorovatovskii,<sup>c</sup> Mikhail A. Kiskin,<sup>a</sup> Igor L. Eremenko<sup>a,d</sup> and Anna V. Vologzhanina<sup>\*d</sup>

---

<sup>a</sup> N. S. Kurnakov Institute of General and Inorganic Chemistry, RAS. 31 Leninsky prosp. 119991 Moscow, Russia.

<sup>b</sup> Chemistry Department, Lomonosov Moscow State University, Leninsky gory, 1-3, 119991 Moscow, Russian Federation

<sup>c</sup> National Research Center "Kurchatov Institute", 1 Kurchatova pl., Moscow 123098, Russia

<sup>d</sup> A. N. Nesmeyanov Institute of Organoelement Compounds, RAS. 28 Vavilova str. 119334 Moscow, Russia. E-mail: [vologzhanina@mail.ru](mailto:vologzhanina@mail.ru)

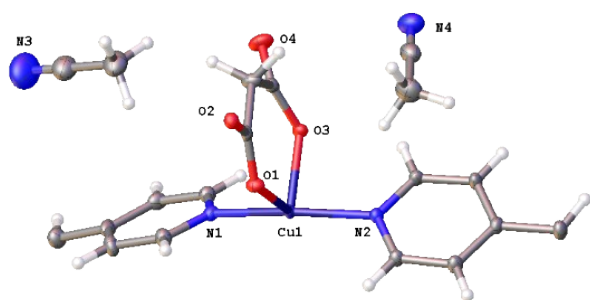

[Cu(bpe)mal] · 2CH<sub>3</sub>CN

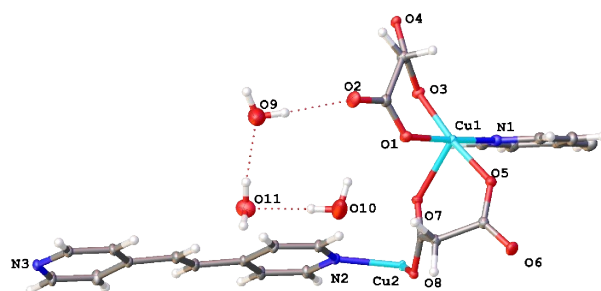

[Cu<sub>4</sub>(bpe)<sub>3</sub>mal<sub>4</sub>] · 6H<sub>2</sub>O

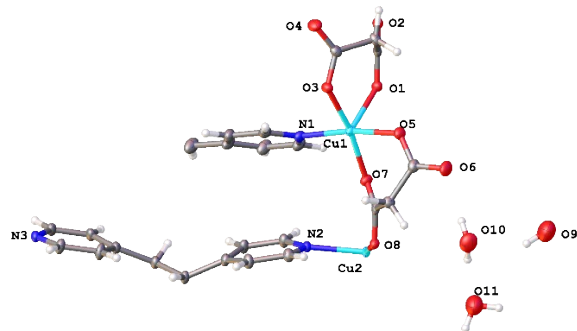

[Cu<sub>4</sub>(bpe)(tpcb)mal<sub>4</sub>] · 6H<sub>2</sub>O

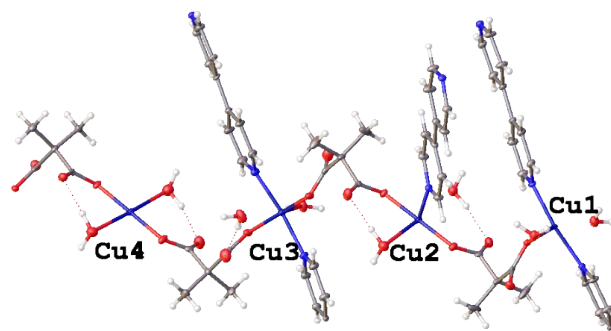

[Cu<sub>4</sub>(bipy)<sub>4</sub>(Me<sub>2</sub>mal)<sub>4</sub>(H<sub>2</sub>O)<sub>5</sub>] · 3H<sub>2</sub>O

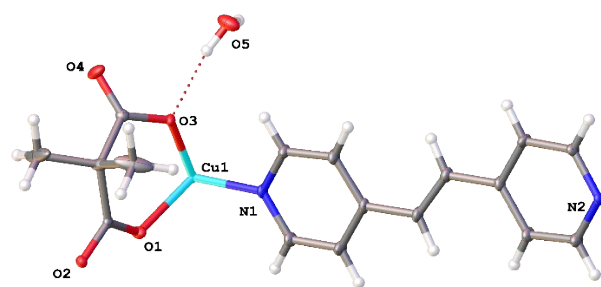

[Cu(bpe)Me<sub>2</sub>mal] · H<sub>2</sub>O

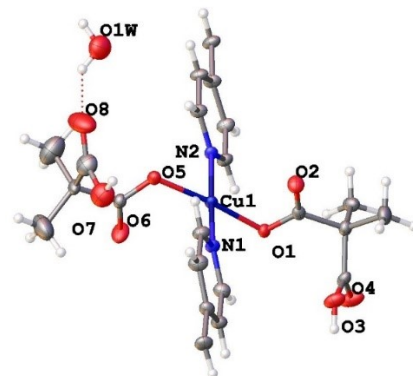

[Cu(bpe)(HMe<sub>2</sub>mal)<sub>2</sub>] · H<sub>2</sub>O

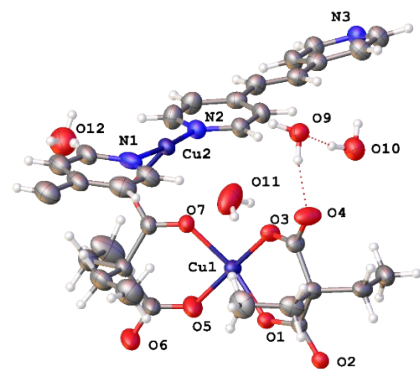

[Cu<sub>4</sub>(bpe)<sub>3</sub>(Et<sub>2</sub>mal)<sub>4</sub>] · 5H<sub>2</sub>O

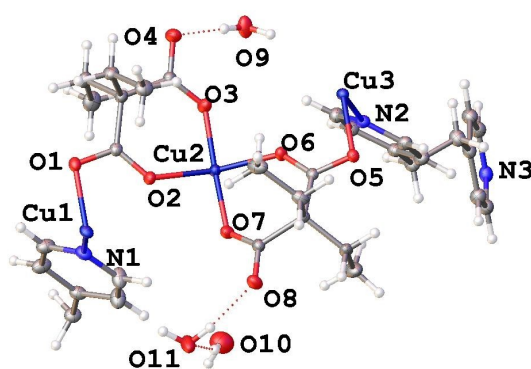

[Cu<sub>4</sub>(bpa)<sub>3</sub>(Et<sub>2</sub>mal)<sub>4</sub>] · 5.5H<sub>2</sub>O

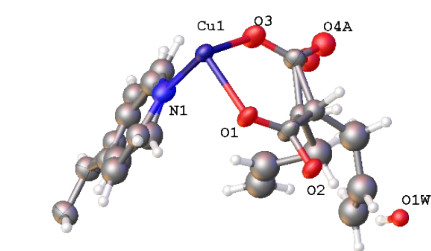

[Cu(bpe)Amal] · 0.25H<sub>2</sub>O

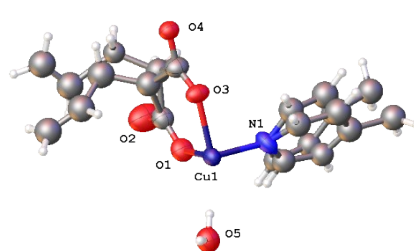

[Cu(bpa)Amal] · 0.25H<sub>2</sub>O

**Figure S1.** Asymmetric units of studied compounds.

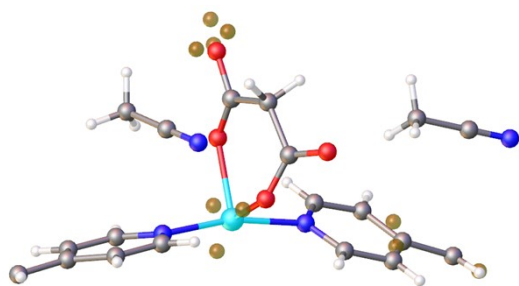

[Cu(bpe)mal] · 2CH<sub>3</sub>CN

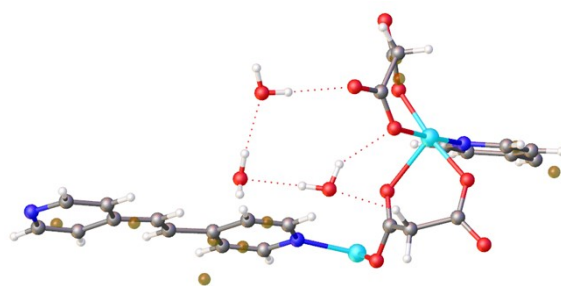

[Cu<sub>4</sub>(bpe)<sub>3</sub>mal<sub>4</sub>] · 6H<sub>2</sub>O

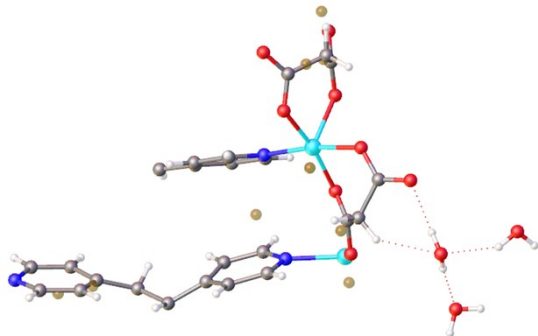

[Cu<sub>4</sub>(bpe)(tpcb)mal<sub>4</sub>] · 6H<sub>2</sub>O

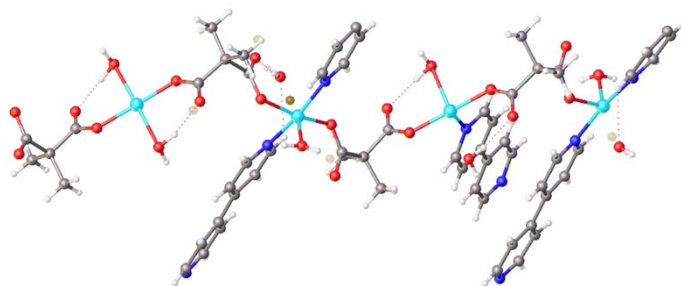

[Cu<sub>4</sub>(bipy)<sub>4</sub>(Me<sub>2</sub>mal)<sub>4</sub>(H<sub>2</sub>O)<sub>5</sub>] · 3H<sub>2</sub>O

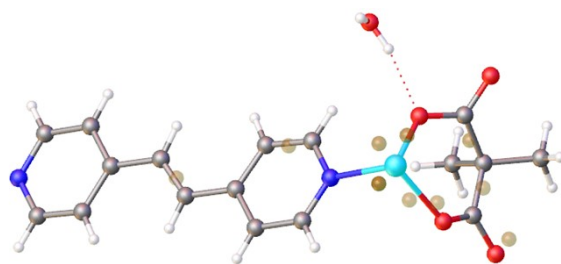

[Cu(bpe)Me<sub>2</sub>mal] · H<sub>2</sub>O

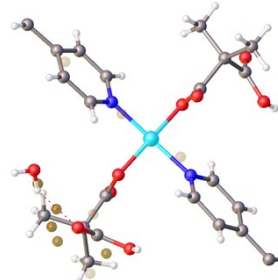

[Cu(bpe)(HMe<sub>2</sub>mal)<sub>2</sub>] · H<sub>2</sub>O

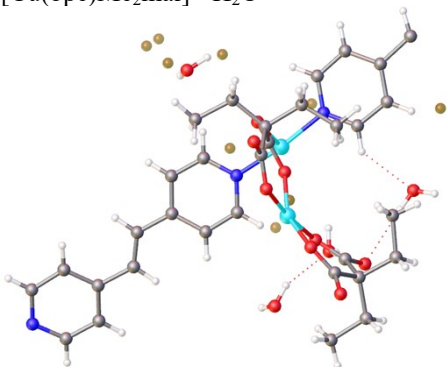

[Cu<sub>4</sub>(bpe)<sub>3</sub>(Et<sub>2</sub>mal)<sub>4</sub>] · 5H<sub>2</sub>O

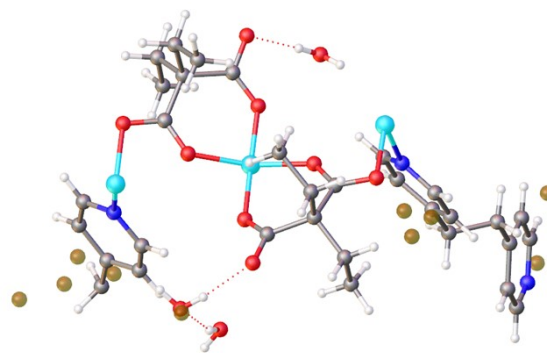

[Cu<sub>4</sub>(bpa)<sub>3</sub>(Et<sub>2</sub>mal)<sub>4</sub>] · 5.5H<sub>2</sub>O

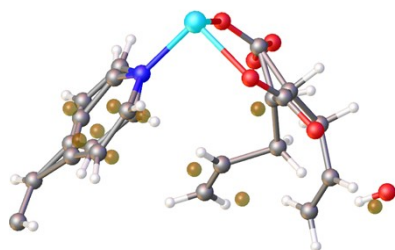

[Cu(bpe)Amal] · 0.25H<sub>2</sub>O

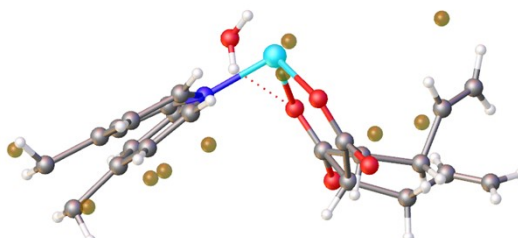

[Cu(bpa)Amal] · 0.25H<sub>2</sub>O

**Figure S2.** Residual density peaks Q1-Q10 (brown spheres) for compounds 1 - 10.

## Powder X-ray diffraction

The powder XRD data were collected on a Bruker D8 Advance diffractometer (Bruker, Billerica, MA, USA) with a LynxEye detector in reflection mode with the sample thinly dispersed on a zero-background Si sample holder,  $\lambda(\text{CuK}\alpha) = 1.54060 \text{ \AA}$ ,  $\theta/\theta$  scan with variable slits (irradiated length 20 mm),  $2\theta$  from  $5^\circ$  to  $41^\circ$ , step size  $0.02^\circ$ .

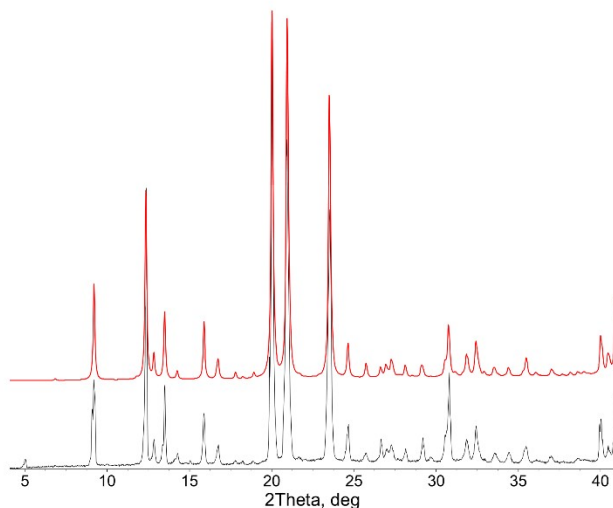

**Figure S3.** XRD powder patterns for compound  $[\text{Cu}(\text{bpe})\text{Me}_2\text{mal}] \cdot \text{H}_2\text{O}$ : experimental (black line), calculated (red line)

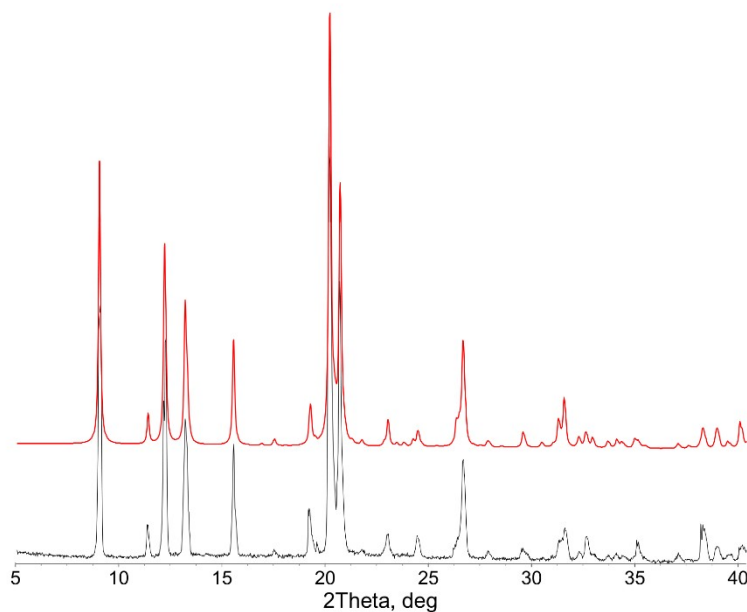

**Figure S4.** XRD powder patterns for compound  $[\text{Cu}(\text{bpe})\text{Amal}] \cdot 0.25\text{H}_2\text{O}$ : experimental (black line), calculated (red line)

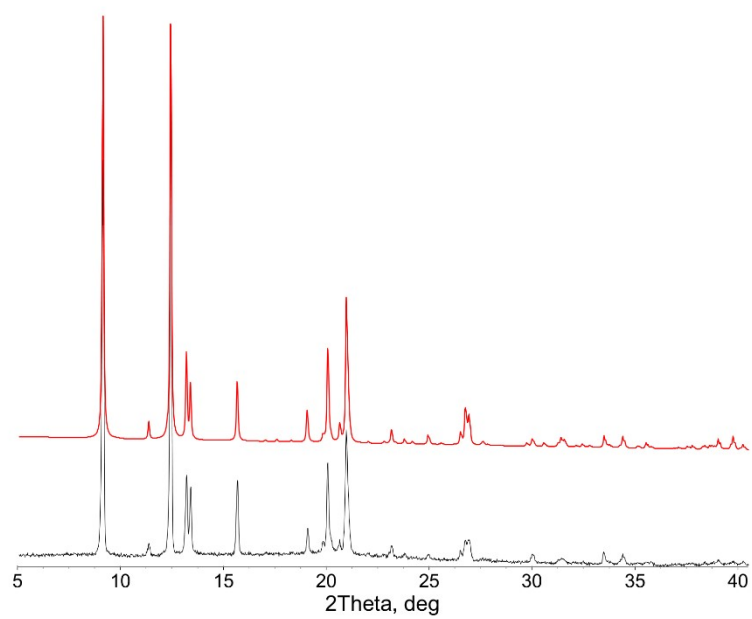

**Figure S5.** XRD powder patterns for compound [Cu(bpa)Amal]·0.25H<sub>2</sub>O: experimental (black line), calculated (red line)

**Table S1.** Previously Reported Copper(II) Malonate Complexes with 4,4'-Bipyridine and its Analogs.

| Complex                                                                                                                   | CCF                                                    | net              | Refcode |
|---------------------------------------------------------------------------------------------------------------------------|--------------------------------------------------------|------------------|---------|
| $\{[\text{Cu}_2(\text{bpe})_2(\text{mal})_2(\text{H}_2\text{O})_2] \cdot 2\text{H}_2\text{O}\}_n$                         | $\text{A}_2\text{T}^{11}_2\text{B}^2\text{M}^1_2$      | <b>hcb</b>       | DASVUQ  |
| $[\text{Cu}_2(\text{bipy})(\text{Memal})_2(\text{H}_2\text{O})_2]_n$                                                      | $\text{A}_2\text{K}^4_2\text{B}^2$                     | <b>3,5T3</b>     | EDOKAK  |
| $(\text{H}_2\text{bpe})[\text{Cu}(\text{mal})_2] \cdot 4\text{H}_2\text{O}$                                               | $\text{AB}^{01}_2$                                     | Isolated complex | ELOHES  |
| $\{[\text{Cu}_4(\text{bpe})_3(\text{mal})_4] \cdot 6\text{H}_2\text{O}\}_n$                                               | $\text{A}_4\text{T}^{21}_2\text{T}^{11}_2\text{B}^2_3$ | <b>3,3,5L29</b>  | ELOHIW  |
| $\{[\text{Cu}_2(\text{bipy})_4(\text{Memal})(\text{H}_2\text{O})(\text{NO}_3)](\text{NO}_3) \cdot \text{H}_2\text{O}\}_n$ | $\text{A}_2\text{K}^{21}_2\text{B}^2\text{M}^1_2$      | <b>pcu</b>       | GAKTET  |
| $\{[\text{Cu}_2(\text{bipy})_2(\text{Memal})_2(\text{H}_2\text{O})] \cdot \text{H}_2\text{O}\}_n$                         | $\text{A}_2\text{B}^2\text{M}^1_3$                     | <b>2C1</b>       | GAKTIX  |
| $\{[\text{Cu}_3(\text{bpa})_3(\text{mal})_2(\text{H}_2\text{O})_2](\text{NO}_3)_2 \cdot 2\text{H}_2\text{O}\}_n$          | $\text{A}_3\text{K}^{21}_2\text{B}^2_3\text{M}^1_2$    | <b>tfz</b>       | HACDUL  |
| $\{[\text{Cu}_2(\text{bpam})_3(\text{mal})_2(\text{H}_2\text{O})_2] \cdot \text{H}_2\text{O}\}_n$                         | $\text{A}_2\text{T}^{11}_2\text{B}^2\text{M}^1$        | <b>hcb</b>       | HISTAF  |
| $\{[\text{Cu}(\text{bipy})(\text{Phmal})] \cdot \text{H}_2\text{O}\}_n$                                                   | $\text{AT}^{11}\text{B}^2$                             | <b>sql</b>       | JERLIC  |
| $\{[\text{Cu}_2(\text{bipy})_2(\text{mal})_2(\text{H}_2\text{O})_2] \cdot 2\text{H}_2\text{O}\}_n$                        | $\text{A}_2\text{T}^{11}_2\text{B}^2\text{M}^1_2$      | <b>fes</b>       | NAYJUS  |
| $\{[\text{Cu}_2(\text{bpam})(\text{mal})_2(\text{H}_2\text{O})_2] \cdot 2\text{H}_2\text{O}\}_n$                          | $\text{A}_2\text{T}^{11}_2\text{B}^2\text{M}^1_2$      | <b>sql</b>       | PASGIA  |
| $[\text{Cu}_2(\text{bipy})_2(\text{cbdc})_2]_n$                                                                           | $\text{AT}^{11}\text{B}^2$                             | <b>sql</b>       | PERZOC  |
| $[\text{Cu}(\text{bpa})(\text{cbdc})]_n$                                                                                  | $\text{AT}^{11}\text{B}^2$                             | <b>sql</b>       | PERZUI  |
| $\{[\text{Cu}_2(\text{bipy})_4(\text{mal})_2](\text{ClO}_4)_2 \cdot \text{MeOH} \cdot 4\text{H}_2\text{O}\}_n$            | $\text{A}_2\text{K}^{21}_2\text{B}^2_4$                | <b>pcu</b>       | SEYNAM  |
| $[\text{Cu}_2(\text{bipy})_2(\text{mal})_2(\text{H}_2\text{O})_2]_n$                                                      | $\text{A}_2\text{T}^{11}_2\text{B}^2\text{M}^1_2$      | <b>fes</b>       | VIWQIB  |
| $\{[\text{Cu}(\text{dpp})(\text{Me}_2\text{mal})] \cdot 3\text{H}_2\text{O}\}_n$                                          | $\text{AB}^2_2\text{M}^1$                              | <b>sql</b>       | VOPMAQ  |
| $\{[\text{Cu}(\text{dpp})_2(\text{H}_2\text{O})_2][\text{Cu}(\text{Et}_2\text{mal})_2] \cdot 4\text{H}_2\text{O}\}_n$     | $\text{AB}^2_2\text{M}^1_2 + \text{AB}^{01}_2$         | <b>2C1</b>       | VOPMEU  |
| $\{[\text{Cu}_3(\text{dpp})_4(\text{mal})_3] \cdot 12\text{H}_2\text{O}\}_n$                                              | $\text{A}_3\text{B}^2_4\text{B}^{01}_2\text{M}^1_3$    | <b>Sq1</b>       | VOPMIY  |
| $\{[\text{Cu}(\text{dpp})(\text{mal})(\text{H}_2\text{O})] \cdot 4\text{H}_2\text{O}\}_n$                                 | $\text{AB}^{01}\text{B}^2\text{M}^1$                   | <b>2C1</b>       | XUQBIV  |
| $[\text{Cu}_2(\text{bipy})_2(\text{cbdc})_2]_n$                                                                           | $\text{AT}^{11}\text{B}^2$                             | <b>sql</b>       | YAHJUP  |
| $\{[\text{Cu}_2(\text{bpa})_2(\text{cbdc})_2] \cdot \text{MeOH}\}_n$                                                      | $\text{AT}^{11}\text{B}^2$                             | <b>sql</b>       | YAMYOD  |

a Etmal = ethylmalonate; Memal = methylmalonate; Me<sub>2</sub>mal = dimethylmalonate; cbcd = cyclobutane-1,1-dicarboxylate; mal = malonate; dpp = 4,4'-propane-1,3-diyldipyridine; Phmal = phenylmalonate; bpam - 4,4'-Dipyridylamine

**Table S2.** Occurrences of various coordination polyhedra in 583 mixed-ligand copper(II) complexes.<sup>a</sup>

| CN | CP                            | occurrence | p <sub>CP</sub> , % |
|----|-------------------------------|------------|---------------------|
| 4  | N <sub>4</sub>                | 1          | 1                   |
|    | N <sub>3</sub> O              | 0          | 0                   |
|    | N <sub>2</sub> O <sub>2</sub> | 181        | 91                  |
|    | NO <sub>3</sub>               | 12         | 6                   |
|    | O <sub>4</sub>                | 4          | 2                   |
| 5  | N <sub>5</sub>                | 0          | 0                   |
|    | N <sub>4</sub> O              | 1          | 0.2                 |
|    | N <sub>3</sub> O <sub>2</sub> | 6          | 1                   |
|    | N <sub>2</sub> O <sub>3</sub> | 195        | 44                  |
|    | NO <sub>4</sub>               | 235        | 53                  |
|    | O <sub>5</sub>                | 7          | 1                   |
| 6  | N <sub>6</sub>                | 0          | 0                   |
|    | N <sub>5</sub> O              | 0          | 0                   |
|    | N <sub>4</sub> O <sub>2</sub> | 1          | 1                   |
|    | N <sub>3</sub> O <sub>3</sub> | 0          | 0                   |
|    | N <sub>2</sub> O <sub>4</sub> | 86         | 88                  |
|    | NO <sub>5</sub>               | 11         | 11                  |
|    | O <sub>6</sub>                | 0          | 0                   |

<sup>a</sup> CN and CP – coordination number and coordination polyhedron of copper(II) atoms; p<sub>CP</sub> is probability of occurrence of a given polyhedron.

**Table S3.** Crystallographic data and experimental details for malonate- and dimethylmalonate-containing compounds.

| Parameter                                                                        | [Cu(bpe)mal] · 2CH <sub>3</sub> CN<br>(1)                       | [Cu <sub>4</sub> (bpe) <sub>3</sub> mal <sub>4</sub> ]<br>· 6H <sub>2</sub> O (2) | [Cu <sub>4</sub> (bipy) <sub>4</sub> (Me <sub>2</sub> mal) <sub>4</sub> (H <sub>2</sub> O) <sub>5</sub> ]<br>· 3H <sub>2</sub> O (3) | [Cu(bpe)(HMe <sub>2</sub> mal) <sub>2</sub> ]·H <sub>2</sub> O<br>(4) | [Cu(bpe)Me <sub>2</sub> mal]·H <sub>2</sub> O<br>(5)            |
|----------------------------------------------------------------------------------|-----------------------------------------------------------------|-----------------------------------------------------------------------------------|--------------------------------------------------------------------------------------------------------------------------------------|-----------------------------------------------------------------------|-----------------------------------------------------------------|
| CCDC                                                                             | 2233546                                                         | 2233547                                                                           | 2233548                                                                                                                              | 2233549                                                               | 2233550                                                         |
| Empirical formula                                                                | C <sub>19</sub> H <sub>18</sub> CuN <sub>4</sub> O <sub>4</sub> | C <sub>48</sub> H <sub>50</sub> Cu <sub>4</sub> N <sub>6</sub> O <sub>22</sub>    | C <sub>60</sub> H <sub>72</sub> Cu <sub>4</sub> N <sub>8</sub> O <sub>24</sub>                                                       | C <sub>22</sub> H <sub>25</sub> CuN <sub>2</sub> O <sub>8.5</sub>     | C <sub>17</sub> H <sub>18</sub> CuN <sub>2</sub> O <sub>5</sub> |
| Formula weight                                                                   | 429.91                                                          | 1317.10                                                                           | 1543.41                                                                                                                              | 516.98                                                                | 393.87                                                          |
| Color, habit                                                                     | Blue, prism                                                     | Blue, plate                                                                       | Blue, prism                                                                                                                          | Violet, plate                                                         | Light-Blue, prism                                               |
| Crystal size (mm)                                                                | 0.42×0.29×0.17                                                  | 0.28×0.26×0.06                                                                    | 0.23×0.21×0.18                                                                                                                       | 0.29×0.22×0.03                                                        | 0.20×0.11×0.11                                                  |
| <i>a</i> (Å)                                                                     | 8.806(2)                                                        | 13.4822(9)                                                                        | 24.8208(14)                                                                                                                          | 9.193(2)                                                              | 13.4355(11)                                                     |
| <i>b</i> (Å)                                                                     | 9.110(3)                                                        | 10.2082(7)                                                                        | 19.2806(11)                                                                                                                          | 12.176(5)                                                             | 14.4906(12)                                                     |
| <i>c</i> (Å)                                                                     | 23.923(6)                                                       | 19.4797(13)                                                                       | 13.1952(8)                                                                                                                           | 20.620(8)                                                             | 8.9824(7)                                                       |
| $\beta$ (°)                                                                      | 96.827(6)                                                       | 105.290(2)                                                                        | 95.6250(10)                                                                                                                          | 98.301(18)                                                            | 99.255(2)                                                       |
| <i>V</i> (Å <sup>3</sup> )                                                       | 1905.5(9)                                                       | 2586.1(3)                                                                         | 6284.3(6)                                                                                                                            | 2283.8(15)                                                            | 1726.0(2)                                                       |
| Crystal system                                                                   | Monoclinic                                                      | Monoclinic                                                                        | Monoclinic                                                                                                                           | Monoclinic                                                            | Monoclinic                                                      |
| Space group, <i>Z</i>                                                            | P 2 <sub>1</sub> /n, 4                                          | P 2 <sub>1</sub> /n, 2                                                            | P 2 <sub>1</sub> /c, 4                                                                                                               | P 2 <sub>1</sub> /c, 4                                                | P 2 <sub>1</sub> /c, 4                                          |
| <i>D</i> <sub>cal</sub> (g cm <sup>-3</sup> )                                    | 1.499                                                           | 1.691                                                                             | 1.631                                                                                                                                | 1.504                                                                 | 1.516                                                           |
| $\mu$ (mm <sup>-1</sup> )                                                        | 1.179                                                           | 1.712                                                                             | 1.425                                                                                                                                | 1.010                                                                 | 1.295                                                           |
| Reflections collected                                                            | 13783                                                           | 35457                                                                             | 57730                                                                                                                                | 27039                                                                 | 27355                                                           |
| Independent reflections<br>( <i>R</i> <sub>int</sub> )                           | 5831 (0.037)                                                    | 10607 (0.086)                                                                     | 18491 (0.047)                                                                                                                        | 6976 (0.086)                                                          | 6576 (0.051)                                                    |
| Obs.refl./restraints/<br>parameters                                              | 4602 / 0 / 255                                                  | 6656 / 0 / 370                                                                    | 11155 / 5 / 890                                                                                                                      | 4503 / 42 / 313                                                       | 5187 / 0 / 231                                                  |
| <i>R</i> , <sup>a</sup> % [ <i>F</i> <sup>2</sup> > 2σ( <i>F</i> <sup>2</sup> )] | 0.044                                                           | 0.050                                                                             | 0.059                                                                                                                                | 0.088                                                                 | 0.042                                                           |
| <i>R</i> <sub>w</sub> , <sup>b</sup> % ( <i>F</i> <sup>2</sup> )                 | 0.107                                                           | 0.110                                                                             | 0.171                                                                                                                                | 0.207                                                                 | 0.111                                                           |
| <i>GOF</i>                                                                       | 1.044                                                           | 0.996                                                                             | 1.016                                                                                                                                | 1.010                                                                 | 1.053                                                           |
| F(000)                                                                           | 884                                                             | 1344                                                                              | 3184                                                                                                                                 | 1072                                                                  | 812                                                             |

$$^a R = \sum | |F_o| - |F_c| | / \sum |F_o|, \quad ^b R_w = [\sum(w(F_o^2 - F_c^2)^2) / \sum(w(F_o^2))]^{1/2}, \quad ^c GOF = [\sum w(F_o^2 - F_c^2)^2 / (N_{\text{obs}} - N_{\text{param}})]^{1/2}$$



**Table S4.** Crystallographic data and experimental details for diethyl- and allylmalonate-containing complexes.

|                                                                                  | [Cu <sub>4</sub> (bpe) <sub>3</sub> (Et <sub>2</sub> mal) <sub>4</sub> ] · 5H <sub>2</sub> O (6) | [Cu <sub>4</sub> (bpa) <sub>3</sub> (Et <sub>2</sub> mal) <sub>4</sub> ] · 5.5H <sub>2</sub> O (7) | [Cu(bpe)Amal] · 0.25H <sub>2</sub> O (8)                             | [Cu(bpa)Amal] · 0.25H <sub>2</sub> O (9)                             | [Cu <sub>4</sub> (bpe)(tpcb)mal <sub>4</sub> ] · 6H <sub>2</sub> O (10)        |
|----------------------------------------------------------------------------------|--------------------------------------------------------------------------------------------------|----------------------------------------------------------------------------------------------------|----------------------------------------------------------------------|----------------------------------------------------------------------|--------------------------------------------------------------------------------|
| CCDC                                                                             | 2233551                                                                                          | 2233552                                                                                            | 2233553                                                              | 2233554                                                              | 2233555                                                                        |
| Empirical formula                                                                | C <sub>64</sub> H <sub>80</sub> Cu <sub>4</sub> N <sub>6</sub> O <sub>21</sub>                   | C <sub>64</sub> H <sub>87</sub> Cu <sub>4</sub> N <sub>6</sub> O <sub>21.5</sub>                   | C <sub>18</sub> H <sub>15.5</sub> CuN <sub>2</sub> O <sub>4.25</sub> | C <sub>18</sub> H <sub>18.5</sub> CuN <sub>2</sub> O <sub>4.25</sub> | C <sub>48</sub> H <sub>50</sub> Cu <sub>4</sub> N <sub>6</sub> O <sub>22</sub> |
| Formula weight                                                                   | 1523.50                                                                                          | 1538.55                                                                                            | 391.36                                                               | 394.39                                                               | 1317.10                                                                        |
| Color, habit                                                                     | Blue, plate                                                                                      | Blue, plate                                                                                        | Blue, prism                                                          | Light-blue, needle                                                   | Blue, plate                                                                    |
| Crystal size (mm)                                                                | 0.02×0.15×0.16                                                                                   | 0.06×0.27×0.31                                                                                     | 0.38×0.26×0.19                                                       | 0.42 × 0.08 × 0.06                                                   | 0.28×0.26×0.06                                                                 |
| <i>a</i> (Å)                                                                     | 20.737(4)                                                                                        | 16.7676(6)                                                                                         | 9.1259(7)                                                            | 9.296(6)                                                             | 13.399(17)                                                                     |
| <i>b</i> (Å)                                                                     | 8.4420(17)                                                                                       | 13.2787(5)                                                                                         | 13.4355(10)                                                          | 13.349(8)                                                            | 10.334(14)                                                                     |
| <i>c</i> (Å)                                                                     | 40.952(8)                                                                                        | 17.0342(6)                                                                                         | 14.5446(11)                                                          | 14.339(9)                                                            | 19.28(2)                                                                       |
| <i>β</i> (°)                                                                     | 97.09(3)                                                                                         | 117.980(2)                                                                                         | 90                                                                   | 90                                                                   | 103.69(3)                                                                      |
| <i>V</i> (Å <sup>3</sup> )                                                       | 7114(3)                                                                                          | 3349.4(2)                                                                                          | 1783.3(2)                                                            | 1779.4(18)                                                           | 2594(6)                                                                        |
| Crystal system                                                                   | Monoclinic                                                                                       | Monoclinic                                                                                         | Orthorhombic                                                         | Orthorhombic                                                         | Monoclinic                                                                     |
| Space group, <i>Z</i>                                                            | C 2/ <i>c</i> , 4                                                                                | P 2 <sub>1</sub> / <i>n</i> , 2                                                                    | P <i>n</i> <i>m</i> <i>a</i> , 4                                     | P <i>n</i> <i>m</i> <i>a</i> , 4                                     | P 2 <sub>1</sub> / <i>n</i> , 2                                                |
| <i>D</i> <sub>cal</sub> (g cm <sup>-3</sup> )                                    | 1.422                                                                                            | 1.526                                                                                              | 1.458                                                                | 1.472                                                                | 1.686                                                                          |
| <i>μ</i> (mm <sup>-1</sup> )                                                     | 1.653                                                                                            | 1.333                                                                                              | 1.250                                                                | 1.253                                                                | 1.707                                                                          |
| Reflections collected                                                            | 20573                                                                                            | 45830                                                                                              | 18649                                                                | 17254                                                                | 59570                                                                          |
| Independent reflections ( <i>R</i> <sub>int</sub> )                              | 8265 (0.032)                                                                                     | 10278 (0.028)                                                                                      | 2845 (0.047)                                                         | 2757 (0.184)                                                         | 8680 (0.067)                                                                   |
| Obs.refl./restraints/parameters                                                  | 6432 / 6 / 437                                                                                   | 8792 / 0 / 440                                                                                     | 2168 / 14 / 145                                                      | 1082 / 10 / 113                                                      | 6391 / 0 / 370                                                                 |
| <i>R</i> , <sup>a</sup> % [ <i>F</i> <sup>2</sup> > 2σ( <i>F</i> <sup>2</sup> )] | 0.086                                                                                            | 0.033                                                                                              | 0.063                                                                | 0.094                                                                | 0.042                                                                          |
| <i>R</i> <sub>w</sub> , <sup>b</sup> % ( <i>F</i> <sup>2</sup> )                 | 0.223                                                                                            | 0.093                                                                                              | 0.140                                                                | 0.226                                                                | 0.109                                                                          |
| <i>GOF</i>                                                                       | 1.039                                                                                            | 1.067                                                                                              | 1.059                                                                | 0.997                                                                | 1.034                                                                          |
| F(000)                                                                           | 3160                                                                                             | 1602                                                                                               | 802                                                                  | 814                                                                  | 1344                                                                           |

$$^a R = \sum | |F_o| - |F_c| | / \sum |F_o|$$

$$^b R_w = [\sum(w(F_o^2 - F_c^2)^2) / \sum(w(F_o^2))]^{1/2}$$

$$^c \text{GOF} = [\sum w(F_o^2 - F_c^2)^2 / (N_{\text{obs}} - N_{\text{param}})]^{1/2}$$

**Table S5.** Selected geometry parameters of coordination polyhedra of copper(II) atoms in **1 – 10**.

| Parameter                                                                   | distance (Å) | Parameter                                      | angle (°)  | Parameter                                      | angle (°)  |
|-----------------------------------------------------------------------------|--------------|------------------------------------------------|------------|------------------------------------------------|------------|
| <b>Complex 1</b>                                                            |              |                                                |            |                                                |            |
| coordination polyhedron Cu(1)N <sub>2</sub> O <sub>3</sub> , square pyramid |              |                                                |            |                                                |            |
| Cu(1)–O(1)                                                                  | 2.1403(17)   | O(2 <sup>i</sup> )–Cu(1)–O(1)                  | 97.04(6)   | O(3)–Cu(1)–N(1)                                | 89.42(7)   |
| Cu(1)–O(2 <sup>i</sup> )                                                    | 1.9740(16)   | O(2 <sup>i</sup> )–Cu(1)–N(1)                  | 88.83(7)   | O(3)–Cu(1)–N(2)                                | 90.02(7)   |
| Cu(1)–O(3)                                                                  | 1.9319(15)   | O(2 <sup>i</sup> )–Cu(1)–N(2)                  | 89.71(7)   | N(1)–Cu(1)–O(1)                                | 95.56(6)   |
| Cu(1)–N(1)                                                                  | 2.0396(17)   | O(3)–Cu(1)–O(1)                                | 91.37(6)   | N(1)–Cu(1)–N(2)                                | 166.27(7)  |
| Cu(1)–N(2)                                                                  | 2.0425(17)   | O(3)–Cu(1)–O(2 <sup>i</sup> )                  | 171.54(6)  | N(2)–Cu(1)–O(1)                                | 98.17(6)   |
| <b>Complex 2</b>                                                            |              |                                                |            |                                                |            |
| coordination polyhedron Cu(1)NO <sub>4</sub> , square pyramid               |              |                                                |            |                                                |            |
| Cu(1)–O(1)                                                                  | 1.9903(17)   | O(1)–Cu(1)–O(7)                                | 90.95(7)   | O(5)–Cu(1)–O(1)                                | 95.23(7)   |
| Cu(1)–O(3)                                                                  | 1.9809(17)   | O(1)–Cu(1)–N(1)                                | 176.27(8)  | O(5)–Cu(1)–O(3)                                | 172.888(7) |
| Cu(1)–O(5)                                                                  | 1.9624(17)   | O(1)–Cu(1)–O(3)                                | 88.16(7)   | O(5)–Cu(1)–O(7)                                | 88.16(7)   |
| Cu(1)–O(7)                                                                  | 2.2598(17)   | O(3)–Cu(1)–O(7)                                | 98.06(7)   | O(5)–Cu(1)–N(1)                                | 88.48(8)   |
| Cu(1)–N(1)                                                                  | 2.024(2)     | O(3)–Cu(1)–N(1)                                | 88.12(8)   | N(1)–Cu(1)–O(7)                                | 89.52(8)   |
| <b>Complex 2</b>                                                            |              |                                                |            |                                                |            |
| coordination polyhedron Cu(2)N <sub>2</sub> O <sub>3</sub> , square pyramid |              |                                                |            |                                                |            |
| Cu(2)–O(4 <sup>ii</sup> )                                                   | 1.9438(17)   | O(4 <sup>ii</sup> )–Cu(2)–O(8)                 | 174.98(7)  | O(8)–Cu(2)–N(2)                                | 91.25(7)   |
| Cu(2)–O(8)                                                                  | 1.9680(17)   | O(4 <sup>ii</sup> )–Cu(2)–O(8 <sup>iii</sup> ) | 99.58(6)   | O(8)–Cu(2)–N(3 <sup>iv</sup> )                 | 91.14(8)   |
| Cu(2)–O(8 <sup>iii</sup> )                                                  | 2.3361(16)   | O(4 <sup>ii</sup> )–Cu(2)–N(2)                 | 92.19(8)   | N(2)–Cu(2)–O(8 <sup>iii</sup> )                | 89.58(7)   |
| Cu(2)–N(1)                                                                  | 2.0277(19)   | O(4 <sup>ii</sup> )–Cu(2)–N(3 <sup>iv</sup> )  | 85.67(8)   | N(2)–Cu(2)–N(3 <sup>iv</sup> )                 | 175.60(8)  |
| Cu(2)–N(3 <sup>iv</sup> )                                                   | 2.0749(19)   | O(8)–Cu(2)–O(8 <sup>iii</sup> )                | 76.79(7)   | N(3 <sup>iv</sup> )–Cu(2)–O(8 <sup>iii</sup> ) | 94.57(7)   |
| <b>Complex 3</b>                                                            |              |                                                |            |                                                |            |
| coordination polyhedron Cu(1)N <sub>2</sub> O <sub>3</sub> , square pyramid |              |                                                |            |                                                |            |
| Cu(1)–O(1)                                                                  | 1.948(2)     | O(1)–Cu(1)–O(15 <sup>v</sup> )                 | 165.82(11) | N(1)–Cu(1)–O(15 <sup>v</sup> )                 | 88.95(11)  |
| Cu(1)–O(15 <sup>v</sup> )                                                   | 1.975(2)     | O(1)–Cu(1)–O(17)                               | 111.96(10) | N(3)–Cu(1)–O(15 <sup>v</sup> )                 | 89.39(10)  |
| Cu(1)–O(17)                                                                 | 2.260(3)     | O(1)–Cu(1)–N(1)                                | 87.89(10)  | N(1)–Cu(1)–O(17)                               | 93.12(11)  |
| Cu(1)–N(1)                                                                  | 2.035(3)     | O(1)–Cu(1)–N(3)                                | 91.19(10)  | N(3)–Cu(1)–O(17)                               | 96.98(11)  |
| Cu(1)–N(3)                                                                  | 2.031(3)     | O(17)–Cu(1)–O(15 <sup>v</sup> )                | 82.01(10)  | N(1)–Cu(1)–N(3)                                | 169.44(12) |
| <b>Complex 3</b>                                                            |              |                                                |            |                                                |            |
| coordination polyhedron Cu(2)N <sub>2</sub> O <sub>3</sub> , square pyramid |              |                                                |            |                                                |            |
| Cu(2)–O(4)                                                                  | 1.962(2)     | O(4)–Cu(2)–O(19)                               | 88.61(10)  | O(5)–Cu(2)–N(4)                                | 91.92(11)  |
| Cu(2)–O(5)                                                                  | 1.958(2)     | O(4)–Cu(2)–N(4)                                | 88.58(11)  | O(5)–Cu(2)–N(7 <sup>vi</sup> )                 | 88.23(10)  |
| Cu(2)–O(19)                                                                 | 2.389(3)     | O(4)–Cu(2)–N(7 <sup>vi</sup> )                 | 91.26(10)  | N(4)–Cu(2)–O(19)                               | 88.39(11)  |
| Cu(2)–N(4)                                                                  | 2.030(3)     | O(5)–Cu(2)–O(4)                                | 179.43(10) | N(4)–Cu(2)–N(7 <sup>vi</sup> )                 | 178.87(13) |
| Cu(2)–N(7 <sup>vi</sup> )                                                   | 2.031(3)     | O(5)–Cu(2)–O(19)                               | 91.68(10)  | N(7 <sup>vi</sup> )–Cu(2)–O(19)                | 92.73(11)  |
| <b>Complex 3</b>                                                            |              |                                                |            |                                                |            |
| coordination polyhedron Cu(3)N <sub>2</sub> O <sub>3</sub> , square pyramid |              |                                                |            |                                                |            |
| Cu(3)–O(7)                                                                  | 1.951(3)     | O(7)–Cu(3)–O(9)                                | 165.35(12) | O(9)–Cu(3)–N(6)                                | 88.41(11)  |
| Cu(3)–O(9)                                                                  | 1.973(3)     | O(7)–Cu(3)–O(21)                               | 113.17(11) | O(9)–Cu(3)–N(8)                                | 89.74(11)  |
| Cu(3)–O(21)                                                                 | 2.308(3)     | O(7)–Cu(3)–N(6)                                | 90.99(11)  | N(6)–Cu(3)–O(21)                               | 97.99(12)  |
| Cu(3)–N(6)                                                                  | 2.037(3)     | O(7)–Cu(3)–N(8)                                | 88.34(11)  | N(6)–Cu(3)–N(8)                                | 170.11(14) |

|                                                                                                 |            |                                                  |            |                                               |            |
|-------------------------------------------------------------------------------------------------|------------|--------------------------------------------------|------------|-----------------------------------------------|------------|
| Cu(3)–N(8)                                                                                      | 2.043(3)   | O(9)–Cu(3)–O(21)                                 | 81.39(11)  | N(8)–Cu(3)–O(21)                              | 91.34(12)  |
| <b>Complex 3</b><br>coordination polyhedron Cu(4)N <sub>2</sub> O <sub>4</sub> , octahedron     |            |                                                  |            |                                               |            |
| Cu(4)–O(11)                                                                                     | 1.954(2)   | O(11)–Cu(4)–O(13)                                | 179.12(12) | O(13)–Cu(4)–N(2 <sup>vi</sup> )               | 88.42(10)  |
| Cu(4)–O(13)                                                                                     | 1.959(2)   | O(11)–Cu(4)–O(23)                                | 90.31(11)  | O(13)–Cu(4)–N(5 <sup>ii</sup> )               | 91.17(10)  |
| Cu(4)–O(23)                                                                                     | 2.379(3)   | O(11)–Cu(4)–O(24)                                | 91.27(11)  | O(23)–Cu(4)–O(24)                             | 178.22(10) |
| Cu(4)–O(24)                                                                                     | 2.434(3)   | O(11)–Cu(4)–N(2 <sup>vi</sup> )                  | 91.99(11)  | N(2 <sup>vi</sup> )–Cu(4)–O(23)               | 96.68(11)  |
| Cu(4)–N(2 <sup>vi</sup> )                                                                       | 2.051(3)   | O(11)–Cu(4)–N(5 <sup>ii</sup> )                  | 88.45(11)  | N(2 <sup>vi</sup> )–Cu(4)–O(24)               | 84.09(11)  |
| Cu(4)–N(5 <sup>ii</sup> )                                                                       | 2.047(3)   | O(13)–Cu(4)–O(23)                                | 88.87(11)  | N(5 <sup>ii</sup> )–Cu(4)–O(23)               | 85.91(11)  |
|                                                                                                 |            | O(13)–Cu(4)–O(24)                                | 89.54(10)  | N(5 <sup>ii</sup> )–Cu(4)–N(2 <sup>vi</sup> ) | 177.37(13) |
| <b>Complex 4</b><br>coordination polyhedron Cu(1)N <sub>2</sub> O <sub>2</sub> , square         |            |                                                  |            |                                               |            |
| Cu(1)–O(1)                                                                                      | 1.947(3)   | O(1)–Cu(1)–N(1)                                  | 91.29(16)  | O(5)–Cu(1)–N(1)                               | 88.74(16)  |
| Cu(1)–N(1)                                                                                      | 1.997(4)   | O(1)–Cu(1)–N(2)                                  | 91.10(16)  | O(5)–Cu(1)–N(2)                               | 89.43(16)  |
| Cu(1)–N(2)                                                                                      | 2.001(4)   | N(1)–Cu(1)–N(2)                                  | 174.20(18) |                                               |            |
| Cu(1)–O(5)                                                                                      | 1.944(4)   | O(5)–Cu(1)–O(1)                                  | 174.03(15) |                                               |            |
| <b>Complex 5</b><br>coordination polyhedron Cu(1)N <sub>2</sub> O <sub>3</sub> , square pyramid |            |                                                  |            |                                               |            |
| Cu(1)–O(1)                                                                                      | 2.160(1)   | O(2 <sup>vii</sup> )–Cu(1)–O(1)                  | 103.76(5)  | O(3)–Cu(1)–N(1)                               | 90.23(6)   |
| Cu(1)–O(2 <sup>vii</sup> )                                                                      | 1.991(1)   | O(2 <sup>vii</sup> )–Cu(1)–N(1)                  | 89.12(6)   | O(3)–Cu(1)–N(2 <sup>viii</sup> )              | 91.02(5)   |
| Cu(1)–O(3)                                                                                      | 1.952(1)   | O(2 <sup>vii</sup> )–Cu(1)–N(2 <sup>viii</sup> ) | 88.56(6)   | N(1)–Cu(1)–O(1)                               | 97.35(6)   |
| Cu(1)–N(1)                                                                                      | 2.038(2)   | O(3)–Cu(1)–O(1)                                  | 86.95(5)   | N(1)–Cu(1)–N(2 <sup>viii</sup> )              | 174.03(6)  |
| Cu(1)–N(2 <sup>viii</sup> )                                                                     | 2.052(2)   | O(3)–Cu(1)–O(2 <sup>vii</sup> )                  | 169.26(5)  | N(2 <sup>viii</sup> )–Cu(1)–O(1)              | 88.54(6)   |
| <b>Complex 6</b><br>coordination polyhedron Cu(1)NO <sub>4</sub> , square pyramid               |            |                                                  |            |                                               |            |
| Cu(1)–O(1)                                                                                      | 1.959(4)   | O(1)–Cu(1)–O(7)                                  | 154.2(2)   | O(3)–Cu(1)–N(3 <sup>ix</sup> )                | 94.9(2)    |
| Cu(1)–O(3)                                                                                      | 1.918(4)   | O(1)–Cu(1)–N(3 <sup>ix</sup> )                   | 103.3(2)   | O(5)–Cu(1)–O(1)                               | 86.5(2)    |
| Cu(1)–O(5)                                                                                      | 1.918(5)   | O(3)–Cu(1)–O(1)                                  | 90.4(2)    | O(5)–Cu(1)–O(7)                               | 91.5(2)    |
| Cu(1)–O(7)                                                                                      | 1.974(4)   | O(3)–Cu(1)–O(5)                                  | 171.9(2)   | O(5)–Cu(1)–N(3 <sup>ix</sup> )                | 93.0(2)    |
| Cu(1)–N(3 <sup>ix</sup> )                                                                       | 2.208(5)   | O(3)–Cu(1)–O(7)                                  | 88.1(2)    | O(7)–Cu(1)–N(3 <sup>ix</sup> )                | 102.5(2)   |
| <b>Complex 6</b><br>coordination polyhedron Cu(2)N <sub>2</sub> O <sub>3</sub> , square pyramid |            |                                                  |            |                                               |            |
| Cu(2)–O(1 <sup>x</sup> )                                                                        | 2.435(4)   | O(2 <sup>x</sup> )–Cu(2)–O(1 <sup>x</sup> )      | 57.5(2)    | N(1)–Cu(2)–O(8)                               | 85.9(2)    |
| Cu(2)–O(2 <sup>x</sup> )                                                                        | 2.036(4)   | O(8)–Cu(2)–O(1 <sup>x</sup> )                    | 127.5(2)   | N(2)–Cu(2)–O(1 <sup>x</sup> )                 | 89.2(2)    |
| Cu(2)–O(8)                                                                                      | 2.007(4)   | O(8)–Cu(2)–O(2 <sup>x</sup> )                    | 172.5(2)   | N(2)–Cu(2)–O(2 <sup>x</sup> )                 | 93.6(2)    |
| Cu(2)–N(1)                                                                                      | 1.987(5)   | N(1)–Cu(2)–O(1 <sup>x</sup> )                    | 87.2(2)    | N(2)–Cu(2)–O(8)                               | 92.1(2)    |
| Cu(2)–N(2)                                                                                      | 1.958(5)   | N(1)–Cu(2)–O(2 <sup>x</sup> )                    | 89.0(2)    | N(2)–Cu(2)–N(1)                               | 173.5(2)   |
| <b>Complex 7</b><br>coordination polyhedron Cu(1)N <sub>2</sub> O <sub>2</sub> , square         |            |                                                  |            |                                               |            |
| Cu(1)–O(1)                                                                                      | 2.0189(13) | O(1)–Cu(1)–O(1 <sup>xi</sup> )                   | 180.00(7)  | N(1 <sup>xi</sup> )–Cu(1)–O(1)                | 88.32(6)   |
| Cu(1)–O(1 <sup>xi</sup> )                                                                       | 2.0189(13) | N(1 <sup>xi</sup> )–Cu(1)–O(1 <sup>xi</sup> )    | 91.68(6)   | N(1)–Cu(1)–N(1 <sup>xi</sup> )                | 180.00(10) |
| Cu(1)–N(1 <sup>xi</sup> )                                                                       | 1.9690(14) | N(1)–Cu(1)–O(1)                                  | 91.68(6)   |                                               |            |
| Cu(1)–N(1)                                                                                      | 1.9690(14) | N(1)–Cu(1)–O(1 <sup>xi</sup> )                   | 88.32(6)   |                                               |            |
| <b>Complex 7</b>                                                                                |            |                                                  |            |                                               |            |

|                                                                             |            |                                                  |            |                                               |            |
|-----------------------------------------------------------------------------|------------|--------------------------------------------------|------------|-----------------------------------------------|------------|
| coordination polyhedron Cu(2)NO <sub>4</sub> , square pyramid               |            |                                                  |            |                                               |            |
| Cu(2)–O(2)                                                                  | 1.9558(12) | O(2)–Cu(2)–N(3 <sup>ii</sup> )                   | 107.41(5)  | O(3)–Cu(2)–O(7)                               | 169.88(6)  |
| Cu(2)–O(3)                                                                  | 1.9065(13) | O(2)–Cu(2)–O(6)                                  | 155.41(6)  | O(6)–Cu(2)–N(3 <sup>ii</sup> )                | 97.16(5)   |
| Cu(2)–N(3 <sup>ii</sup> )                                                   | 2.2114(15) | O(3)–Cu(2)–O(2)                                  | 90.78(5)   | O(7)–Cu(2)–O(2)                               | 88.31(5)   |
| Cu(2)–O(6)                                                                  | 1.9604(12) | O(3)–Cu(2)–N(3 <sup>ii</sup> )                   | 93.76(6)   | O(7)–Cu(2)–N(3 <sup>ii</sup> )                | 96.13(6)   |
| Cu(2)–O(7)                                                                  | 1.9185(13) | O(3)–Cu(2)–O(6)                                  | 86.44(5)   | O(7)–Cu(2)–O(6)                               | 90.20(5)   |
| <b>Complex 7</b>                                                            |            |                                                  |            |                                               |            |
| coordination polyhedron Cu(3)N <sub>2</sub> O <sub>2</sub> , square         |            |                                                  |            |                                               |            |
| Cu(3)–N(2)                                                                  | 1.9722(13) | N(2)–Cu(3)–N(2 <sup>xii</sup> )                  | 180.00(19) | N(2)–Cu(3)–O(5 <sup>xii</sup> )               | 88.58(5)   |
| Cu(3)–N(2 <sup>xii</sup> )                                                  | 1.9722(13) | N(2)–Cu(3)–O(5)                                  | 91.42(5)   | O(5 <sup>xii</sup> )–Cu(3)–O(5)               | 180.00(5)  |
| Cu(3)–O(5)                                                                  | 2.0138(12) | N(2 <sup>xii</sup> )–Cu(3)–O(5 <sup>xii</sup> )  | 91.42(5)   |                                               |            |
| Cu(3)–O(5 <sup>xii</sup> )                                                  | 2.0138(12) | N(2 <sup>xii</sup> )–Cu(3)–O(5)                  | 88.58(5)   |                                               |            |
| <b>Complex 8</b>                                                            |            |                                                  |            |                                               |            |
| coordination polyhedron Cu(1)N <sub>2</sub> O <sub>3</sub> , square pyramid |            |                                                  |            |                                               |            |
| Cu(1)–O(2 <sup>xiii</sup> )                                                 | 1.974(4)   | O(2 <sup>xiii</sup> )–Cu(1)–O(1)                 | 93.22(13)  | O(3 <sup>i</sup> )–Cu(1)–N(1 <sup>xiv</sup> ) | 90.06(10)  |
| Cu(1)–O(1)                                                                  | 2.144(3)   | O(2 <sup>xiii</sup> )–Cu(1)–N(1 <sup>xiv</sup> ) | 89.51(10)  | O(3)–Cu(1)–N(1)                               | 90.06(10)  |
| Cu(1)–O(3)                                                                  | 1.942(4)   | O(2 <sup>xiii</sup> )–Cu(1)–N(1)                 | 89.51(10)  | N(1 <sup>xiv</sup> )–Cu(1)–O(1)               | 95.01(9)   |
| Cu(1)–N(1)                                                                  | 2.026(3)   | O(3)–Cu(1)–O(2 <sup>xiii</sup> )                 | 175.06(15) | N(1)–Cu(1)–O(1)                               | 95.01(9)   |
| Cu(1)–N(1 <sup>xiv</sup> )                                                  | 2.026(3)   | O(3)–Cu(1)–O(1)                                  | 91.72(14)  | N(1 <sup>xiv</sup> )–Cu(1)–N(1)               | 169.97(18) |
| <b>Complex 9</b>                                                            |            |                                                  |            |                                               |            |
| coordination polyhedron Cu(1)N <sub>2</sub> O <sub>3</sub> , square pyramid |            |                                                  |            |                                               |            |
| Cu(1)–O(1)                                                                  | 1.955(8)   | O(1)–Cu(1)–O(3)                                  | 91.9(3)    | O(4 <sup>xv</sup> )–Cu(1)–N(1)                | 90.5(2)    |
| Cu(1)–O(3)                                                                  | 2.142(7)   | O(1)–Cu(1)–O(4 <sup>xv</sup> )                   | 175.0(3)   | O(4)–Cu(1)–N(1 <sup>xiv</sup> )               | 90.5(8)    |
| Cu(1)–O(4 <sup>xv</sup> )                                                   | 1.969(7)   | O(1)–Cu(1)–N(1 <sup>xiv</sup> )                  | 89.0(2)    | N(1)–Cu(1)–O(3)                               | 95.89(17)  |
| Cu(1)–N(1)                                                                  | 2.025(6)   | O(1)–Cu(1)–N(1)                                  | 89.0(2)    | N(1 <sup>xiv</sup> )–Cu(1)–O(3)               | 95.9(7)    |
| Cu(1)–N(1 <sup>xiv</sup> )                                                  | 2.025(6)   | O(4 <sup>xv</sup> )–Cu(1)–O(3)                   | 93.2(3)    | N(1)–Cu(1)–N(1 <sup>xiv</sup> )               | 168.1(8)   |
| <b>Complex 10</b>                                                           |            |                                                  |            |                                               |            |
| coordination polyhedron Cu(1)NO <sub>4</sub> , square pyramid               |            |                                                  |            |                                               |            |
| Cu(1)–O(1)                                                                  | 2.285(2)   | O(3)–Cu(1)–O(1)                                  | 88.72(11)  | O(5)–Cu(1)–N(1)                               | 172.12(8)  |
| Cu(1)–O(3)                                                                  | 1.955(2)   | O(3)–Cu(1)–O(5)                                  | 95.86(10)  | O(7)–Cu(1)–O(1)                               | 101.03(11) |
| Cu(1)–O(5)                                                                  | 1.993(2)   | O(3)–Cu(1)–O(7)                                  | 169.51(7)  | O(7)–Cu(1)–O(5)                               | 87.81(9)   |
| Cu(1)–O(7)                                                                  | 1.976(3)   | O(3)–Cu(1)–N(1)                                  | 88.81(10)  | O(7)–Cu(1)–N(1)                               | 86.52(9)   |
| Cu(1)–N(1)                                                                  | 2.028(3)   | O(5)–Cu(1)–O(1)                                  | 91.59(10)  | N(1)–Cu(1)–O(1)                               | 94.87(10)  |
| <b>Complex 10</b>                                                           |            |                                                  |            |                                               |            |
| coordination polyhedron Cu(2)N <sub>2</sub> O <sub>2</sub> , square         |            |                                                  |            |                                               |            |
| Cu(2)–O(2 <sup>xvi</sup> )                                                  | 1.979(3)   | O(2 <sup>xvi</sup> )–Cu(2)–N(2)                  | 91.14(8)   | O(8)–Cu(2)–N(3 <sup>viii</sup> )              | 87.13(8)   |
| Cu(2)–O(8)                                                                  | 1.953(3)   | O(2 <sup>xvi</sup> )–Cu(2)–N(3 <sup>viii</sup> ) | 90.60(8)   | N(2)–Cu(2)–N(3 <sup>viii</sup> )              | 172.13(8)  |
| Cu(2)–N(2)                                                                  | 2.045(3)   | O(8)–Cu(2)–O(2 <sup>xvi</sup> )                  | 168.98(7)  |                                               |            |
| Cu(2)–N(3 <sup>viii</sup> )                                                 | 2.073(3)   | O(8)–Cu(2)–N(2)                                  | 92.54(8)   |                                               |            |

Symmetry code to generate equivalent atoms: (i) 3/2-X, -1/2+Y, 3/2-Z; (ii) 1-X, 1-Y, 1-Z; (iii) 1-X, -Y, 1-Z; (iv) -1+X, +Y, +Z; (v) 1+X, +Y, 1+Z; (vi) 1-X, -1/2+Y, 1/2-Z; (vii) X, 1/2-Y, 1/2+Z; (viii) 1+X, Y, Z; (ix) 1/2-X, -1/2+, 1/2-Z; (x) X, 1+y, Z; (xi) -X, 2-Y, 1-Z; (xii) 1-X, 2-Y, 1-Z; (xiii) 1/2+X, +Y, 1/2-Z; (xiv) X, 1/2-Y, Z; (xv) 1/2+X, +Y, 3/2-Z.
